# Supplementary material for: Diversity Distribution Analysis of Guava (Psidium guajava L.) Populations in Cultivated and Wild Habitats in the Mid-Hills of Uttarakhand, India
Source: MDPI journal article supplement (doi:10.3390/agriculture14040575), 2024-04-04
Supplement: s1 [file s1]

**Supplementary table**

| Sites                              | Names             | Fruit parameters |              |          |                       |
|------------------------------------|-------------------|------------------|--------------|----------|-----------------------|
|                                    |                   | Length (mm)      | Breadth (mm) | WT (g)   | Length/Breadth ration |
| I. Barla<br>(Wild habitat)         | Hill top (Barla)  | 56.48            | 52.18        | 78.518   | 1.082                 |
|                                    | Hill base (Barla) | 61.025           | 62.575       | 130.6175 | 0.975                 |
| II. Pipaltar<br>(Abandoned land)   | Pipaltar-1        | 73.02            | 63.96        | 155.906  | 1.142                 |
|                                    | Pipaltar-2        | 68.05            | 63.15        | 135.3175 | 1.078                 |
|                                    | Pipaltar-3        | 60.8             | 58.72        | 110.592  | 1.035                 |
|                                    | Hajeti -1         | 62.6             | 64.55        | 136.975  | 0.970                 |
|                                    | Hajeti -2         | 49.7             | 54.05        | 77.05    | 0.920                 |
|                                    | Hajeti -3         | 63.65            | 61.4         | 127.26   | 1.037                 |
|                                    | Gwari -1          | 63.1             | 54.35        | 99.415   | 1.161                 |
|                                    | Gwari- 2          | 57.6             | 49.4         | 71.165   | 1.166                 |
|                                    | Gwari -3          | 71.633           | 57.833       | 121.576  | 1.239                 |
|                                    | Gwari -4          | 52.8             | 52.25        | 72.92    | 1.011                 |
| III. Barla village<br>(Cultivated) | Barla-1           | 73.45            | 65.15        | 166.9025 | 1.127                 |
|                                    | Barla -2          | 60.833           | 61.6         | 124.95   | 0.988                 |
|                                    | Barla- 3          | 62.25            | 60.1         | 115.62   | 1.036                 |
|                                    | Barla -4          | 80.7             | 61.9         | 146.01   | 1.304                 |
|                                    | Barla -5          | 58.65            | 55.1         | 93.105   | 1.064                 |
|                                    | Barla- 6          | 60.4             | 60.35        | 120.805  | 1.001                 |
|                                    | Barla -7          | 73               | 66.35        | 181.71   | 1.100                 |
|                                    | Jhadla-1          | 72.2             | 66.325       | 170.7875 | 1.089                 |
|                                    | Jhadla-2          | 79.782           | 70.78        | 207.082  | 1.127                 |
| Site IV (Murti<br>abandoned)       | Gol -1            | 68.12            | 52.04        | 100.08   | 1.309                 |
|                                    | Murti-1           | 57.25            | 45.45        | 60.395   | 1.260                 |
|                                    | Murti -2          | 51.85            | 41.75        | 47.105   | 1.242                 |
|                                    | Murti-3           | 34.35            | 34.05        | 21.39    | 1.009                 |
|                                    | Murti -4          | 41.6             | 39.4         | 33.365   | 1.056                 |
|                                    | Murti- 5          | 43.55            | 42.25        | 41.16    | 1.031                 |
|                                    | Murti- 6          | 50.896           | 48.3         | 64.213   | 1.054                 |
|                                    | Murti -7          | 47.175           | 44.75        | 50.905   | 1.054                 |
| Site V (Gaina<br>cultivated)       | Gaina-1           | 67.84            | 63.22        | 142.47   | 1.073                 |
|                                    | Gaina -2          | 65.54            | 57.58        | 113.15   | 1.138                 |
|                                    | Gudauli -1        | 53.48            | 52.88        | 81.758   | 1.011                 |
|                                    | Gudauli -2        | 65.225           | 61.175       | 135.53   | 1.066                 |
|                                    | Gudauli -3        | 52.2             | 54.9         | 91.7     | 0.951                 |
|                                    | Gudauli -4        | 65               | 58.3         | 127.438  | 1.115                 |
|                                    | Gudauli -5        | 62               | 57.2         | 115.832  | 1.084                 |

|  |            |       |       |        |       |
|--|------------|-------|-------|--------|-------|
|  | Gudauli-6  | 55.45 | 50.2  | 76.04  | 1.105 |
|  | Gudauli- 7 | 55    | 52.75 | 85.485 | 1.043 |
|  | Gudauli -8 | 52.8  | 54.05 | 85.56  | 0.977 |
